# Supplementary material for: Cellular and Molecular Mechanisms and Effects of Berberine on Obesity-Induced Inflammation
Source: MDPI journal article supplement (doi:10.3390/biomedicines10071739), 2022-07-19
Supplement: s1 [file s1]

## Supplementary Figures

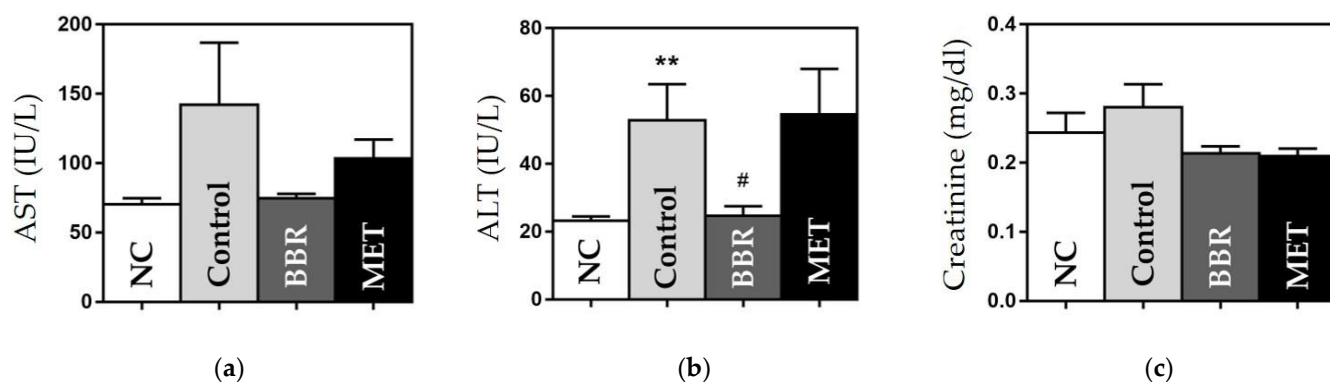

**Supplementary Figure S1.** Safety profile of BBR administration. **(a)** AST levels, **(b)** ALT levels, **(c)** Creatinine levels. Data are presented as mean ± standard error of the mean (SEM). \*\* $p < 0.01$  versus the NC group and #  $p < 0.05$  versus the control group.

## Supplementary Tables

**Supplementary Table S1.** Composition of High Fat Diets (D12492).

| Description  | Ingredients              | Grams |
|--------------|--------------------------|-------|
| Fat          | Lard                     | 245.0 |
| Fat          | Soybean Oil, USP         | 25.0  |
| Protein      | Casein, Lactic, 30 mesh  | 200.0 |
| Protein      | Cystine, L               | 3.0   |
| Carbohydrate | Lodex 10                 | 125.0 |
| Carbohydrate | Sucrose, Fine Granulated | 72.8  |
| Fiber        | Solka Floc, FCC200       | 50.0  |
| Mineral      | Mineral mix              | 50.0  |
| Vitamin      | Choline Vitartrate       | 2.0   |
|              | Vitamin mix              | 1.0   |
| Total:       |                          | 773.8 |

**Supplementary Table S2.** The primers used in reverse transcription PCR.

| Gene          | Primer                                                                                          |
|---------------|-------------------------------------------------------------------------------------------------|
| TNF- $\alpha$ | 5'-TTCTG TCTAC TGAAC TTCGG GGTGA TCGGT CC-3'<br>5'-484 GTATG AGATA GCAAA TCGGC TGACG GTGTGGG-3' |
| F4/80         | 5'-CTTTGGC-485 TATGGGCTTCCAGTC-3'<br>5'-GCAAGGAGGACAGAGTTTATCGTG-3'                             |
| CCL2          | 5'-486 AGGTCCCTGTCATGCTTCTGG-3'<br>5'-CTGCTGCTGGTGATCCTCTTG-3'                                  |
| CCL4          | 5'-487 CTCAGCCCTGATGCTTCTCAC-3'<br>5'-AGAGGGGCAGGAAATCTGAAC-3'                                  |
| CCL5          | 5'-TGCCACGTCAAGGAGTATTTC-3'<br>5'-AACCCACTTCTTCTCTGGGTTG-3'                                     |
| CXCR4         | 5'-TCAGTGGCTGACCTCCTCTT-3'<br>5'-CTTGGCCTTTGACTGTTGGT-3'                                        |
| GAPDH         | 5'-AG-TCCATGCCATCACTGCCACC-3'<br>5'-CCAGTGAGCTTCCCGTTCAGC-3'                                    |
